# Supplementary material for: Antibiotic Resistance of Enteric Bacteria in HIV-Infected Patients at the Banka Ad-Lucem Hospital, West Region of Cameroon
Source: Can J Infect Dis Med Microbiol. 2019 Sep 2;2019:9381836. doi: 10.1155/2019/9381836 (PMC6745176; doi:10.1155/2019/9381836)
Supplement: Supplementary Materials — Supporting information supporting file (XLS): all raw data generated to support the findings of this study. [file 9381836.f1.xls]

## Sheet: Feuil1
N 0	Sex	Age	HIV Status	CD4	hs-CRP	Total White blood cells	Lymphocytes	Monocytes	Granulocytes	Bacteria	Enterobacter aerogenes	Klebsiella pneumoniae	E coli	Shigella	Salmonella	Imipeneme	AMC	Norfloxacin	Cipro	Cefixime	Ceftriaxon	Amikacin	Chloramph	MDR	Number S	Number I	Number R	Number (I+R)
1	0	54	1	484	1.08	4.1	2	0.5	1.6	1	1	0	0	0	0	S	R	S	S	S	S	I	I	0	5	2	1	3
2	0	58	1	279	16.4	4.6	2.8	0.5	1.3	3	0	0	1	0	0	S	S	S	S	S	S	S	S	0	8	0	0	0
3	0	38	1	386	40.15	5	1.4	0.3	3.3	3	0	0	1	0	0	S	I	S	S	S	S	S	R	0	6	1	1	2
4	0	52	1	608	15.6	4.6	1.8	0.6	2.2	5	0	0	0	0	1	S	I	S	S	I	I	I	I	0	3	5	0	5
5	1	50	1	299	3.5	2	0.7	0.3	1	1	1	0	0	0	0	S	R	S	S	S	I	S	R	0	5	1	2	3
6	0	25	1	462	1.02	2.7	1.3	0.2	1.2	2	0	1	0	0	0	S	I	S	S	S	R	S	I	0	5	2	1	3
7	0	60	1	416	0.82	4.2	1.2	0.6	2.4	2	0	1	0	0	0	S	I	S	S	S	S	S	S	0	7	1	0	1
8	0	50	1	342	0.11	2.4	1.2	0.2	1	2	0	1	0	0	0	S	S	S	S	S	S	I	S	0	7	1	0	1
9	0	50	1	298	2.95	3.4	1.4	0.5	1.5	5	0	0	0	0	1	S	R	S	S	S	S	I	I	0	5	2	1	3
10	0	36	1	100	0.14	4.5	1.9	0.3	2.3	4	0	0	0	1	0	S	I	S	S	I	R	S	S	0	5	2	1	3
11	1	24	1	242	0.23	5	2.4	0.6	2	3	0	0	1	0	0	S	I	S	S	S	R	S	S	0	6	1	2	3
12	0	38	1	450	1.6	2.6	1.3	0.3	1	5	0	0	0	0	1	S	R	S	S	S	S	I	S	0	6	1	1	2
13	1	58	1	612	0.22	3.9	2.2	0.5	1.2	2	0	1	0	0	0	S	S	S	S	S	I	I	S	0	6	2	0	2
14	1	59	1	472	2.11	5	2.6	0.5	1.9	2	0	1	0	0	0	S	R	S	S	R	S	S	S	0	5	0	3	3
15	0	25	0	925	1.52	3.3	2	0.3	1	1	1	0	0	0	0	S	R	S	S	R	S	I	S	0	4	1	3	4
16	0	34	1	632	1.84	4.1	1.6	0.3	2.2	2	0	1	0	0	0	S	S	S	S	R	R	S	S	0	6	0	2	2
17	0	55	1	305	0.11	2.6	1.4	0.3	0.9	5	0	0	0	0	1	S	S	S	S	I	R	S	R	0	4	3	1	4
18	0	38	1	365	4.08	2.2	0.7	0.3	1.2	2	0	1	0	0	0	S	S	S	S	S	S	S	S	0	8	0	0	0
19	0	48	0	699	3.85	2.8	1.5	0.3	1	4	0	0	0	1	0	S	R	S	S	R	R	I	S	0	4	1	3	4
20	0	24	0	953	12.45	4	1.6	0.6	1.8	2	0	1	0	0	0	S	R	S	S	I	R	I	S	0	4	2	2	4
21	0	65	0	826	11.5	3.4	1.3	0.3	1.8	5	0	0	0	0	1	S	I	S	S	R	S	S	I	0	5	2	1	3
22	0	33	1	517	5.2	3.4	2.5	0.3	0.6	3	0	0	1	0	0	S	I	S	S	S	S	S	S	0	7	1	0	1
23	0	37	1	298	6.4	3.3	2	0.3	1	4	0	0	0	1	0	S	R	S	S	R	I	I	I	0	3	3	2	5
24	0	48	1	428	1.82	4.4	1.3	0.5	2.6	2	0	1	0	0	0	S	R	S	S	S	S	S	S	0	7	0	1	1
25	0	29	1	498	6.45	5.2	1.8	0.3	3.1	2	0	1	0	0	0	S	S	S	S	S	I	I	S	0	6	2	0	2
26	1	60	1	299	26.2	4.7	1.1	0.5	3.1	4	0	0	0	1	0	S	S	S	S	S	S	I	I	0	6	2	0	2
27	0	29	1	322	3.21	3.5	2.4	0.2	0.9	2	0	1	0	0	0	S	R	S	S	I	R	I	I	0	3	3	2	5
28	0	53	1	396	6.02	4.3	1.9	0.4	2	3	0	0	1	0	0	S	R	S	S	S	S	S	S	0	7	0	1	1
29	0	30	1	361	0.21	3.5	1.8	0.2	1.5	4	0	0	0	1	0	S	R	S	S	S	S	S	S	0	7	0	1	1
30	0	40	1	117	4.67	3.6	1.5	0.5	1.6		0	0	0	0	0
31	0	49	1	550	2.82	3.7	1.7	0.4	1.6	3	0	0	1	0	0	S	R	S	S	S	S	S	S	0	7	0	1	1
32	0	73	1	677	0.22	6.2	3.1	0.5	2.6	1	1	0	0	0	0	S	I	S	S	S	I	I	S	0	5	3	0	3
33	1	15	1	334	2.21	5	1.1	0.6	3.3	3	0	0	1	0	0	S	I	S	S	S	S	S	S	0	7	1	0	1
34	0	51	1	538	5.21	3.7	1.9	0.4	1.4	4	0	0	0	1	0	S	I	S	S	R	R	I	S	0	4	2	2	4
35	0	26	1	502	2.51	5.5	2.1	0.7	2.7	2	0	1	0	0	0	S	R	S	S	R	I	I	S	0	4	2	2	4
36	0	43	1	513	40.5	2.1	0.6	0.3	1.2	3	0	0	1	0	0	S	I	S	S	I	S	S	S	0	6	2	0	2
37	0	47	1	334	5.9	3.3	1.5	0.2	1.6	3	0	0	1	0	0	S	S	S	S	R	I	I	R	0	4	2	2	4
38	0	67	1	478	4.01	4.5	2.7	0.4	1.4	4	0	0	0	1	0	S	S	S	S	S	I	I	S	0	6	2	0	2
39	0	81	1	213	2.8	3.4	1.7	0.4	1.3	3	0	0	1	0	0	S	R	S	S	S	I	I	S	0	5	2	1	3
40	1	25	0	915	40.21	4.1	1.4	0.6	2.1		0	0	0	0	0
41	1	64	0	1050	60.25	3	1.8	0.3	0.9	4	0	0	0	1	0	S	R	S	S	I	R	S	R	1	4	1	3	4
42	0	36	1	606	2.36	3.8	2.6	0.2	1	2	0	1	0	0	0	S	R	S	S	R	R	S	S	0	5	0	3	3
43	1	45	1	77	1.64	4.1	1.4	0.4	2.3	4	0	0	0	1	0	S	S	S	S	S	S	I	I	0	6	2	0	2
44	0	23	0	1036	13.21	4.5	2.2	0.7	1.6	1	1	0	0	0	0	S	R	S	S	R	R	I	R	1	3	1
45	0	46	1	439	1.5	4.3	2	0.3	2	1	1	0	0	0	0	S	R	S	S	S	I	I	S	0	5	2
46	0	52	1	512	32.5	3.4	1.3	0.3	1.8	2	0	1	0	0	0	S	S	S	S	I	R	S	S	0	6	1	1	2
47	0	59	1	624	0.49	4	2.3	0.4	1.4	3	0	0	1	0	0	S	R	S	S	R	R	I	S	0	4	1	3	4
48	0	33	1	588	16.4	2.6	1.2	0.5	0.9	5	0	0	0	0	1	S	I	S	S	R	S	I	S	0	3	1	4	5
49	0	36	1	512	12.33	5.7	2.1	0.3	3.3	2	0	1	0	0	0	S	R	S	S	R	R	S	S	0	5	0	3	3
50	0	42	1	472	0.98	4.1	1.1	0.5	2.5	1	1	0	0	0	0	S	R	S	S	S	S	I	S	0	6	1	1	2
51	1	27	0	834	3.21	3.7	1.2	0.5	2	1	1	0	0	0	0	S	R	S	S	R	R	I	R	1	3	1	4	5
52	0	23	0	784	0.91	11.7	3.3	1.8	6.6	2	0	1	0	0	0	S	I	S	S	S	R	S	S	0	6	1	1	2
53	1	24	0	893	14.25	4.1	1.9	0.4	1.8	2	0	1	0	0	0	S	S	S	S	S	I	S	S	0	7	1	0	1
54	0	23	0	915	0.28	4.9	3.2	0.5	1.2		0	0	0	0	0
55	0	24	0	999	6	2.6	1.2	0.3	1.1	1	1	0	0	0	0	S	I	S	S	R	R	I	R	0	3	2	3	5
56	0	54	1	512	3.78	3.3	1.6	0.4	1.3		0	0	0	0	0
57	1	28	0	836	28.4	5.5	3.5	0.5	1.5	4	0	0	0	1	0	S	R	I	S	R	I	S	S	0	4	2	2	4
58	1	25	0	1019	0.01	4.8	2.7	0.3	1.8	1	1	0	0	0	0	S	R	S	S	R	R	S	R	1	4	0	4	4
59	0	36	1	556	4.02	6.2	2.8	0.8	2.6	1	1	0	0	0	0	S	R	S	S	S	S	R	S	0	6	0	2	2
60	0	44	1	538	2.49	3.1	1.5	0.3	1.3	2	0	1	0	0	0	S	R	S	S	R	R	I	R	1	3	1	4	5
61	0	49	1	544	0.5	8	2	0.6	5.4	4	0	0	0	1	0	S	S	S	S	S	S	I	S	0	7	1	0	1
62	1	52	1	539	4.02	3.1	1.7	0.3	1.1	1	1	0	0	0	0	S	R	S	S	R	R	S	S	0	5	0	3	3
63	1	56	1	498	5.04	5.4	2.5	0.8	2.1	4	0	0	0	1	0	S	R	S	S	S	S	S	S	0	7	0	1	1
64	0	3	1	302	0.23	5.9	2.8	0.7	2.4	2	0	1	0	0	0	S	R	S	S	R	R	I	S	0	4	1	3	4
65	0	64	1	564	40.01	2.3	1.1	0.3	0.9	3	0	0	1	0	0	S	I	S	S	S	S	I	S	0	6	2	0	2
66	0	34	1	798	14.28	3.3	1.7	0.4	1.2	2	0	1	0	0	0	S	R	S	S	S	S	S	I	0	6	1	1	2
67	0	49	1	617	4.01	2.1	0.9	0.2	1	2	0	1	0	0	0	S	I	S	S	S	S	S	S	0	7	1	0	1
68	0	60	1	536	1.45	3.3	1.3	0.4	1.6	4	0	0	0	1	0	S	R	S	S	I	R	S	S	0	5	1	2	3
69	1	54	1	514	7.9	4	1.9	0.4	1.7	1	1	0	0	0	0	S	R	S	S	S	S	S	S	0	7	0	1	1
70	0	56	1	624	2.8	4.2	1.6	0.3	2.3	4	0	0	0	1	0	S	S	S	S	S	S	S	S	0	8	0	0	0
71	0	32	1	328	12.85	2.8	1.4	0.2	1.2	2	0	1	0	0	0	S	I	S	S	I	S	S	S	0	6	2	0	2
72	0	46	1	516	1.28	3.5	1.4	0.5	1.6	2	0	1	0	0	0	S	S	S	S	S	S	S	S	0	8	0	0	0
73	0	58	1	324	4.58	5.5	2.1	0.6	2.8	2	0	1	0	0	0	S	I	S	S	R	R	S	S	0	5	1	2	3
74	0	52	1	496	4.32	3.6	1.9	0.5	1.2	2	0	1	0	0	0	S	R	S	S	S	S	I	S	0	6	1	1	2
75	0	32	1	771	4.58	2.5	1.5	0.4	0.6	2	0	1	0	0	0	S	S	S	S	R	R	I	S	0	5	1	2	3
76	0	30	1	670	12.01	3	1	0.3	1.7	2	0	1	0	0	0	S	S	S	S	S	I	I	S	0	6	2	0	2
77	0	19	0	1026	1.59	6.9	1.9	0.5	4.5	1	1	0	0	0	0	S	R	S	S	R	R	S	R	1	4	0	4	4
78	0	44	1	412	0.4	2.9	1.3	0.6	1	2	0	1	0	0	0	S	R	S	S	S	I	I	S	0	5	2	1	3
79	0	59	1	484	12.85	3	1.3	0.3	1.4	2	0	1	0	0	0	S	R	S	S	I	I	I	S	0	4	3	1	4
80	0	28	1	352	2.22	3.6	2.4	0.2	1	3	0	0	1	0	0	S	I	S	S	R	R	I	S	0	4	2	2	4
81	0	64	1	288	23.4	3.6	1.8	0.5	1.3	4	0	0	0	1	0	S	R	S	S	I	I	I	S	0	4	3	1	4
82	1	49	1	699	0.23	3.8	1.4	0.6	1.8	2	0	1	0	0	0	S	S	S	S	S	I	I	S	0	6	2	0	2
83	0	53	1	554	4.85	5.6	1.9	0.8	2.9	2	0	1	0	0	0	S	R	S	S	S	S	S	S	0	7	0	1	1
84	0	35	1	518	3.21	3.1	1.8	0.2	1.1	1	1	0	0	0	0	S	R	S	S	S	I	S	R	0	5	1	2	3
85	0	54	1	296	1.56	3.7	2.2	0.2	1.3	2	0	1	0	0	0	S	I	S	S	R	S	I	S	0	4	2	2	4
86	1	42	1	549	7.33	4.1	2.3	0.3	1.5		0	0	0	0	0
87	1	54	1	755	0.24	4.9	3.1	0.5	1.6	2	0	1	0	0	0	S	R	S	S	S	S	S	S	0	7	0	1	1
88	0	50	1	702	3.09	4.9	3.1	0.5	1.3	2	0	1	0	0	0	S	I	S	S	S	I	S	S	0	6	2	0	2
89	1	45	1	298	1.94	4.1	1.5	0.7	1.9	2	0	1	0	0	0	S	I	S	I	S	S	I	I	0	4	4	0	4
90	1	61	1	312	1.09	6.2	2.9	0.5	2.8	3	0	0	1	0	0	S	S	S	S	S	S	I	S	0	7	1	0	1
91	1	41	0	1016	14.45	5.6	1.1	0.9	3.6	3	0	0	1	0	0	S	I	S	S	S	S	S	S	0	7	1	0	1
92	1	56	0	1150	2.98	4.5	1.5	0.6	2.4		0	0	0	0	0
93	0	53	1	678	1.02	2.9	1.6	0.3	1	1	1	0	0	0	0	S	I	S	S	S	S	R	S	0	6	1	1	2
94	0	62	1	528	8.05	3.9	1.5	0.4	2	3	0	0	1	0	0	S	R	S	S	R	R	I	S	0	4	1	3	4
95	1	49	1	321	32.3	4.3	1.5	0.6	2.2	1	1	0	0	0	0	S	R	S	S	R	R	S	S	0	5	0	3	3
96	0	22	0	812	0.18	4.1	1.2	0.5	2.4	2	0	1	0	0	0	S	I	S	S	S	R	I	S	0	5	2	1	3
97	0	23	0	925	9.86	3.2	1.5	0.3	1.4	1	1	0	0	0	0	S	S	S	S	S	I	S	R	0	6	1	1	2
98	1	16	1	958	4.5	4.7	2.7	0.6	1.4	2	0	1	0	0	0	S	S	S	S	S	I	I	S	0	6	2	0	2
99	0	65	0	1079	0.82	4.2	3	0.4	0.8	2	0	1	0	0	0	S	I	S	S	S	S	I	S	0	6	2	0	2
100	0	34	1	360	4.02	3.6	2.1	0.3	1.2	3	0	0	1	0	0	S	I	S	S	R	I	S	S	0	5	2	1	3
101	1	46	1	483	1.05	5.4	2.7	0.4	2.3	2	0	1	0	0	0	S	R	S	S	S	I	I	S	0	5	2	1	3
102	0	11	1	767	2.1	4	2.1	0.2	1.5	1	1	0	0	0	0	S	R	S	S	S	I	I	S	0	5	2	1	3
103	0	21	0	1000	4.08	4.1	2.9	0.3	0.9	1	1	0	0	0	0	S	R	S	S	R	R	I	S	0	4	1	3	4
104	0	22	0	1026	7.11	3.7	2	0.5	1.2	4	0	0	0	1	0	S	R	S	S	R	R	I	I	0	3	2	3	5
105	0	28	0	968	3.02	4.2	2.3	0.4	1.5	1	1	0	0	0	0	S	R	I	S	R	S	I	R	1	3	2	3	5
106	0	21	0	976	16.4	4.1	2	0.6	1.5	4	0	0	0	1	0	S	R	S	S	S	I	I	I	0	4	3	1	4
107	0	26	0	936	5.99	4.6	2.6	0.3	1.7	2	0	1	0	0	0	S	R	S	S	R	I	I	I	0	3	3	2	5
108	0	27	1	476	3.92	3.7	1.6	0.6	1.5	4	0	0	0	1	0	S	I	S	S	S	S	I	I	0	5	3	0	3
109	0	35	1	173	10.5	4.1	1.1	0.8	2.2	1	1	0	0	0	0	S	S	S	I	S	I	I	S	0	5	3	0	3
110	1	59	1	547	4.85	3.7	2	0.4	1.3	1	1	0	0	0	0	S	R	S	S	R	R	S	R	1	4	0	4	4
111	0	27	1	298	3.29	3.4	1.9	0.3	1.2	4	0	0	0	1	0	S	I	S	S	S	I	I	S		5	3	0	3
112	0	60	1	642	3.08	3.8	1.7	0.4	1.7	4	0	0	0	1	0	S	S	S	S	S	S	I	S		7	1	0	1
113	0	27	0	1250	3.28	9.5	1.7	0.7	7.1	1	1	0	0	0	0	S	R	S	S	R	R	S	S	0	5	0	3	3
114	0	20	0	976	50.23	5.4	1.6	0.7	3.1	2	0	1	0	0	0	S	R	S	S	S	S	S	R	0	6	0	2	2
115	1	52	1	223	6.9	4.7	2.7	0.6	1.4	1	1	0	0	0	0	S	I	I	R	R	R	S	S	0	3	1	3	4
116	0	5	1	761	4.52	4	2.7	0.3	1	1	1	0	0	0	0	S	R	S	S	I	S	S	I	0	5	2	1	3
117	0	11	0	893	0.5	5.1	2.7	0.6	1.8	1	1	0	0	0	0	S	R	S	S	R	R	I	S	0	4	1	3	4
118	1	8	0	812	22.3	6.2	3.7	0.6	1.9	1	1	0	0	0	0	S	R	S	S	R	S	S	S	0	7	0	1	1
119	0	12	1	432	50.4	4.9	1.4	0.6	2.9	1	1	0	0	0	0	S	I	S	S	S	S	I	S	0	6	2	0	2
120	0	26	0	1263	11.2	18	4	3.1	10.9	2	0	1	0	0	0	S	R	S	S	S	S	I	S	0	6	1	1	2
121	1	44	0	900	0.21	5.5	3.1	0.5	1.9	2	0	1	0	0	0	S	R	S	S	R	R	I	I	0	3	2	3	5
122	1	26	0	921	2.89	5.4	3.1	0.7	1.6	2	0	1	0	0	0	S	I	S	S	S	I	I	S	0	5	3	0	3
123	1	16	0	953	0.2	3.1	2.1	0.3	0.7	4	0	0	0	1	0	S	S	R	S	R	R	S	S	0	5	0	3	3
124	1	22	0	1365	38.32	14.1	2.1	1.7	10.3	3	0	0	1	0	0	S	S	S	S	I	I	I	S	0	5	3	0	3
125	0	39	1	63	10.11	5.8	2	0.7	3.1	3	0	0	1	0	0	S	R	S	S	R	I	S	R	1	4	0	4	4
126	0	48	1	488	15.5	7.2	1.8	0.9	4.5	2	0	1	0	0	0	S	R	S	S	S	I	I	S	0	5	2	1	3
127	1	49	1	721	50.2	6.6	3.4	1.3	1.9	1	1	0	0	0	0	S	I	S	S	S	I	S	R	0	5	2	1	3
128	0	25	0	958	0.56	4.7	2.8	0.4	1.5	3	0	0	1	0	0	S	R	S	S	S	S	S	S	0	7	0	1	1
129	0	46	1	362	32	2.8	1.1	0.5	1.2	1	1	0	0	0	0	S	S	S	S	S	S	S	S	0	8	0	0	0
130	1	25	0	823	2.38	4.2	1.6	0.7	1.9	3	0	0	1	0	0	S	R	S	S	R	I	S	S	0	4	0	4	4
131	0	27	0	1036	4.96	3.3	1.7	0.4	1.2	3	0	0	1	0	0	S	I	S	S	S	S	I	S	0	6	2	0	2
132	1	24	0	925	0.21	3.8	1.6	0.5	1.7	2	0	1	0	0	0	S	I	S	S	S	I	I	S	0	5	3	0	3
133	0	6	1	398	4.36	7.5	3.8	1	2.7	2	0	1	0	0	0	S	I	S	S	S	I	S	R	0	5	2	1	3
134	0	25	0	779	0.82	4.7	2.6	0.4	1.7		0	0	0	0	0
135	0	42	1	398	4.8	8.3	5.1	0.9	2.3	3	0	0	1	0	0	S	S	S	S	S	S	I	S	0	6	1	1	2
136	0	60	1	360	0.22	4.7	2.8	0.5	1.4	2	0	1	0	0	0	S	R	S	S	S	S	S	S	0	7	0	1	1
137	0	3	0	860	1.02	4.9	2.6	0.7	1.6	2	0	1	0	0	0	S	S	S	S	S	S	I	S	0	7	1	0	1
138	1	27	1	310	2.4	7	3.9	0.8	2.3	1	1	0	0	0	0	S	I	S	S	S	I	S	R	0	5	2	1	3
139	0	63	1	450	6.1	4.3	0.6	0.5	3.2	1	1	0	0	0	0	S	R	I	I	S	I	S	S	0	4	3	1	4
140	0	14	0	729	32.2	5.1	1.3	1	2.8	4	0	0	0	1	0	S	R	S	S	S	S	I	R	0	5	1	2	3
141	0	13	1	342	8.2	4.7	2.9	0.5	1.3	1	1	0	0	0	0	S	S	S	S	S	S	I	S	0	7	1	0	1
142	0	23	0	823	4	3.8	1.8	0.5	1.5	1	1	0	0	0	0	S	S	S	S	R	R	I	S	0	5	1	2	3
143	0	27	0	925	5.02	5.2	2.2	0.8	2.2	2	0	1	0	0	0	S	S	S	S	S	I	I	I	0	5	3	0	3
144	0	23	0	834	2.98	6.6	3.9	0.6	2.1	1	1	0	0	0	0	S	R	R	S	S	S	S	R	1	5	0	3	3
145	0	20	0	1012	3.33	4.1	2.9	0.3	0.9	1	1	0	0	0	0	S	R	S	S	I	R	S	I	0	4	2	2	4
146	1	28	0	825	11.9	3.7	2	0.5	1.2	2	0	1	0	0	0	S	R	S	S	S	S	I	S	0	7	1	0	1
147	1	18	0	898	6.78	4.2	2.3	0.4	1.5	3	0	0	1	0	0	S	R	S	S	S	S	I	S	0	6	1	1	2
148	0	28	0	1335	3.34	4.1	2	0.6	1.5	2	0	1	0	0	0	S	S	S	S	S	S	I	S	0	7	1	0	0
